# Supplementary material for: NK-cell dysfunction of acute myeloid leukemia in relation to the renin–angiotensin system and neurotransmitter genes
Source: PubMed Central journal article supplement (PMC9490854; doi:10.1515/med-2022-0551), 2022-09-20
Supplement: med-2022-0551-sm.pdf [file med-2022-0551-sm.pdf]

# Supplementary material

**Table S1:** All clusters regarding functional annotation analysis are presented

| <b>Annotation Cluster 1</b> | <b>Pathways Enrichment Score: 2.05</b>                       | <b>P value</b>        | <b>Benjamini</b>       |
|-----------------------------|--------------------------------------------------------------|-----------------------|------------------------|
| INTERPRO                    | Neurotransmitter-gated ion-channel, conserved site           | $8.80 \times 10^{-4}$ | $6.00 \times 10^{-2}$  |
| INTERPRO                    | Neurotransmitter-gated ion-channel transmembrane domain      | $1.00 \times 10^{-3}$ | $6.00 \times 10^{-2}$  |
| INTERPRO                    | Neurotransmitter-gated ion-channel                           | $1.00 \times 10^{-3}$ | $6.00 \times 10^{-2}$  |
| INTERPRO                    | Neurotransmitter-gated ion-channel ligand binding            | $1.00 \times 10^{-3}$ | $6.00 \times 10^{-2}$  |
| INTERPRO                    | Nicotinic acetylcholine receptor                             | $2.40 \times 10^{-3}$ | $1.20 \times 10^{-1}$  |
| UP_KEYWORDS                 | Synapse                                                      | $2.80 \times 10^{-3}$ | $2.20 \times 10^{-1}$  |
| UP_KEYWORDS                 | Ion channel                                                  | $2.90 \times 10^{-3}$ | $2.20 \times 10^{-1}$  |
| UP_KEYWORDS                 | Ligand-gated ion channel                                     | $3.90 \times 10^{-3}$ | $2.20 \times 10^{-1}$  |
| GOTERM_MF_DIRECT            | acetylcholine receptor activity                              | $4.20 \times 10^{-3}$ | $3.50 \times 10^{-1}$  |
| GOTERM_MF_DIRECT            | acetylcholine-activated cation-selective channel activity    | $4.20 \times 10^{-3}$ | $3.50 \times 10^{-1}$  |
| INTERPRO                    | Nicotinic acetylcholine-gated receptor, transmembrane domain | $4.30 \times 10^{-3}$ | $1.70 \times 10^{-1}$  |
| GOTERM_CC_DIRECT            | acetylcholine-gated channel complex                          | $4.30 \times 10^{-3}$ | $6.10 \times 10^{-10}$ |
| GOTERM_MF_DIRECT            | acetylcholine binding                                        | $5.30 \times 10^{-3}$ | $3.50 \times 10^{-1}$  |
| UP_KEYWORDS                 | Postsynaptic cell membrane                                   | $5.50 \times 10^{-3}$ | $2.30 \times 10^{-1}$  |
| GOTERM_BP_DIRECT            | neuromuscular synaptic transmission                          | $5.50 \times 10^{-3}$ | $1.00 \times 10^{00}$  |
| GOTERM_MF_DIRECT            | ligand-gated ion channel activity                            | $1.00 \times 10^{-2}$ | $4.90 \times 10^{-1}$  |
| GOTERM_BP_DIRECT            | synaptic transmission, cholinergic                           | $1.10 \times 10^{-2}$ | $1.00 \times 10^{00}$  |
| <b>Annotation Cluster 2</b> | <b>Pathways Enrichment Score: 1.93</b>                       | <b>P value</b>        | <b>Benjamini</b>       |
| KEGG_PATHWAY                | Renin-angiotensin system                                     | $4.60 \times 10^{-6}$ | $3.60 \times 10^{-4}$  |
| GOTERM_BP_DIRECT            | proteolysis                                                  | $2.00 \times 10^{-2}$ | $1.00 \times 10^{00}$  |
| GOTERM_MF_DIRECT RT         | metallopeptidase activity                                    | $4.60 \times 10^{-2}$ | $1.00 \times 10^{00}$  |
| UP_KEYWORDS                 | Protease                                                     | $6.30 \times 10^{-2}$ | $8.00 \times 10^{-1}$  |
| <b>Annotation Cluster 3</b> | <b>Pathways Enrichment Score: 0.83</b>                       | <b>P value</b>        | <b>Benjamini</b>       |
| UP_KEYWORDS                 | Zinc                                                         | $4.50 \times 10^{-1}$ | $1.00 \times 10^{00}$  |
| GOTERM_MF_DIRECT            | zinc ion binding                                             | $2.20 \times 10^{-1}$ | $1.00 \times 10^{00}$  |
| UP_KEYWORDS                 | Metal-binding                                                | $3.60 \times 10^{-1}$ | $1.00 \times 10^{00}$  |
| INTERPRO                    | Zinc finger C2H2-type/integrase DNA binding domain           | $7.90 \times 10^{-1}$ | $1.00 \times 10^{00}$  |
| SMART                       | ZnF C2H2                                                     | $7.90 \times 10^{-1}$ | $1.00 \times 10^{00}$  |
| INTERPRO                    | Zinc finger, C2H2-like                                       | $8.20 \times 10^{-1}$ | $1.00 \times 10^{00}$  |
| UP_KEYWORDS                 | Zinc-finger                                                  | $8.40 \times 10^{-1}$ | $1.00 \times 10^{00}$  |
| UP_SEQ_FEATURE              | metal ion-binding site: Zinc; catalytic                      | 0.092                 | 1                      |
| INTERPRO                    | Zinc finger, C2H2                                            | $8.40 \times 10^{-1}$ | $1.00 \times 10^{00}$  |

(Continued)

Table S1: *Continued*

| Annotation Cluster 3 | Pathways Enrichment Score: 0.83          | P value               | Benjamini             |
|----------------------|------------------------------------------|-----------------------|-----------------------|
| Annotation Cluster 4 | Pathways Enrichment Score: 0.59          | P value               | Benjamini             |
| GOTERM_CC DIRECT     | postsynaptic membrane                    | $1.10 \times 10^{-2}$ | $7.80 \times 10^{-1}$ |
| UP_KEYWORDS          | Ion transport                            | $1.30 \times 10^{-2}$ | $3.90 \times 10^{-1}$ |
| GOTERM_BP_DIRECT     | Ion transport                            | $1.70 \times 10^{-2}$ | $1.00 \times 10^{00}$ |
| GOTERM_BP DIRECT     | cation transmembrane transport           | $1.80 \times 10^{-2}$ | $1.00 \times 10^{00}$ |
| UP_KEYWORDS          | Transport                                | $2.20 \times 10^{-2}$ | $4.20 \times 10^{-1}$ |
| GOTERM_CC DIRECT     | cell junction                            | $4.10 \times 10^{-2}$ | $1.00 \times 10^{00}$ |
| UP_KEYWORDS          | cell junction                            | $5.00 \times 10^{-2}$ | $7.10 \times 10^{-1}$ |
| KEGG PATHWAY         | Neuroactive ligand-receptor interaction  | $1.70 \times 10^{-1}$ | $1.00 \times 10^{00}$ |
| UP_KEYWORDS          | Receptor                                 | $2.00 \times 10^{-1}$ | $1.00 \times 10^{00}$ |
| GOTERM_BP_DIRECT     | chemical synaptic transmission           | $2.80 \times 10^{-1}$ | $1.00 \times 10^{00}$ |
| Annotation Cluster 5 | Pathways Enrichment Score: 0.55          | P value               | Benjamini             |
| GOTERM_CC_DIRECT     | integral component of plasma<br>membrane | $7.00 \times 10^{-1}$ | $1.00 \times 10^{00}$ |
| UP_KEYWORDS          | Ion channel                              | $2.90 \times 10^{-3}$ | $2.20 \times 10^{-1}$ |
| UP_KEYWORDS          | Ion channel                              | $1.30 \times 10^{-2}$ | $3.90 \times 10^{-1}$ |
| UP_KEYWORDS          | Chloride channel                         | $1.70 \times 10^{-2}$ | $4.20 \times 10^{-1}$ |
| UP_KEYWORDS          | Chloride                                 | $3.40 \times 10^{-2}$ | $5.20 \times 10^{-1}$ |
| GOTERM_BP_DIRECT     | chloride transmembrane transport         | $6.00 \times 10^{-2}$ | $1.00 \times 10^{00}$ |
| UP_SEQ_FEATURE       | metal ion-binding site: Zinc; catalytic  | $9.20 \times 10^{-2}$ | $1.00 \times 10^{00}$ |
| UP_KEYWORDS          | Metalloprotease                          | $1.20 \times 10^{-1}$ | $1.00 \times 10^{00}$ |
| UP_KEYWORDS          | Hydrolase                                | $3.40 \times 10^{-1}$ | $1.00 \times 10^{00}$ |
| GOTERM_BP_DIRECT     | positive regulation of GTPase activity   | $2.20 \times 10^{-1}$ | $1.00 \times 10^{00}$ |
| Annotation Cluster 6 | Pathways Enrichment Score: 0.37          | P value               | Benjamini             |
| UP_SEQ FEATURE       | domain:PH                                | $2.50 \times 10^{-1}$ | $1.00 \times 10^{00}$ |
| INTERPRO             | Pleckstrin homology-like domain          | $2.50 \times 10^{-1}$ | $1.00 \times 10^{00}$ |
| SMART                | PH                                       | $2.60 \times 10^{-1}$ | $1.00 \times 10^{00}$ |
| UP_SEQ_FEATURE       | transmembrane region                     | $1.20 \times 10^{-1}$ | $1.00 \times 10^{00}$ |
| UP_KEYWORDS          | Transmembrane helix                      | $2.80 \times 10^{-1}$ | $1.00 \times 10^{00}$ |
| UP_KEYWORDS          | Membrane                                 | $1.80 \times 10^{-1}$ | $1.00 \times 10^{00}$ |
| UP_SEQ_FEATURE       | topological domain:Cytoplasmic           | $2.80 \times 10^{-1}$ | $1.00 \times 10^{00}$ |
| UP_KEYWORDS          | Transmembrane                            | $2.80 \times 10^{-1}$ | $1.00 \times 10^{00}$ |
| UP_SEQ_FEATURE       | topological domain: Extracellular        | $3.00 \times 10^{-1}$ | $1.00 \times 10^{00}$ |
| UP_SEQ_FEATURE       | glycosylation site: N-linked (GlcNAc...) | $3.00 \times 10^{-1}$ | $1.00 \times 10^{00}$ |
| GOTERM_CC DIRECT     | integral component of membrane           | $4.70 \times 10^{-1}$ | $1.00 \times 10^{00}$ |
| UP_KEYWORDS          | Glycoprotein                             | $5.30 \times 10^{-1}$ | $1.00 \times 10^{00}$ |
| Annotation Cluster 7 | Pathways Enrichment Score: 0.11          | P value               | Benjamini             |
| UP_KEYWORDS          | Calmodulin-binding                       | $2.20 \times 10^{-2}$ | $4.20 \times 10^{-1}$ |

(Continued)

Table S1: Continued

| Annotation Cluster 7 | Pathways Enrichment Score: 0.11                 | P value               | Benjamini             |
|----------------------|-------------------------------------------------|-----------------------|-----------------------|
| GOTERM_MF DIRECT     | calmodulin binding                              | $4.50 \times 10^{-2}$ | $1.00 \times 10^{00}$ |
| INTERPRO             | Serine/threonine-protein kinase,<br>active site | $3.70 \times 10^{-1}$ | $1.00 \times 10^{00}$ |
| UP_SEQ_FEATURE       | binding site:ATP                                | $3.80 \times 10^{-1}$ | $1.00 \times 10^{00}$ |
| SMART                | S TKC                                           | $4.00 \times 10^{-1}$ | $1.00 \times 10^{00}$ |
| UP_KEYWORDS          | Serine/threonine-protein kinase                 | $4.60 \times 10^{-1}$ | $1.00 \times 10^{00}$ |
| INTERPRO             | Protein kinase, ATP binding site                | $4.60 \times 10^{-1}$ | $1.00 \times 10^{00}$ |
| UP_SEQ_FEATURE       | nucleotide phosphate-binding<br>region: ATP     | $5.50 \times 10^{-1}$ | $1.00 \times 10^{00}$ |
| UP_KEYWORDS          | Methylation                                     | $5.60 \times 10^{-1}$ | $1.00 \times 10^{00}$ |
| UP_SEQ_FEATURE       | domain:Protein kinase                           | $5.60 \times 10^{-1}$ | $1.00 \times 10^{00}$ |
| GOTERM_BP_DIRECT     | protein phosphorylation                         | $5.90 \times 10^{-1}$ | $1.00 \times 10^{00}$ |
| INTERPRO             | Protein kinase, catalytic domain                | $6.00 \times 10^{-1}$ | $1.00 \times 10^{00}$ |
| INTERPRO             | Protein kinase-like domain                      | $6.40 \times 10^{-1}$ | $1.00 \times 10^{00}$ |
| UP_KEYWORDS          | ATP-binding                                     | $6.50 \times 10^{-1}$ | $1.00 \times 10^{00}$ |
| UP_KEYWORDS          | Nucleotide-binding                              | $7.20 \times 10^{-1}$ | $1.00 \times 10^{00}$ |
| UP_SEQ_FEATURE       | active site:Proton acceptor                     | $7.50 \times 10^{-1}$ | $1.00 \times 10^{00}$ |
| GOTERM MF DIRECT     | ATP-binding                                     | $7.60 \times 10^{-1}$ | $1.00 \times 10^{00}$ |
| UP_KEYWORDS          | Kinase                                          | $7.90 \times 10^{-1}$ | $1.00 \times 10^{00}$ |
| UP_SEQ_FEATURE       | glycosylation site:N-linked (GlcNAc...)         | $3.00 \times 10^{-1}$ | $1.00 \times 10^{00}$ |
| UP_KEYWORDS          | Signal                                          | $3.70 \times 10^{-1}$ | $1.00 \times 10^{00}$ |
| UP_SEQ_FEATURE       | signal peptide                                  | $4.50 \times 10^{-1}$ | $1.00 \times 10^{00}$ |
| UP_SEQ_FEATURE       | disulfide bond                                  | $4.80 \times 10^{-1}$ | $1.00 \times 10^{00}$ |
| UP_KEYWORDS          | Disulfide bond                                  | $6.10 \times 10^{-1}$ | $1.00 \times 10^{00}$ |
| GOTERM_CC DIRECT     | extracellular space                             | $6.60 \times 10^{-1}$ | $1.00 \times 10^{00}$ |
| GOTERM_CC_DIRECT     | extracellular region                            | $8.00 \times 10^{-1}$ | $1.00 \times 10^{00}$ |
| UP_KEYWORDS          | Secreted                                        | $9.00 \times 10^{-1}$ | $1.00 \times 10^{00}$ |
